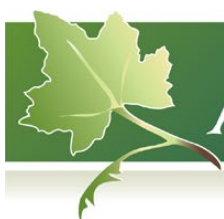

## Studies

## Recent range expansion in Australian hummock grasses (*Triodia*) inferred using genotyping-by-sequencing

Benjamin M. Anderson<sup>1,2,5\*</sup>, Kevin R. Thiele<sup>1</sup>, Pauline F. Grierson<sup>1</sup>, Siegfried L. Krauss<sup>1,2</sup>, Paul G. Nevill<sup>1,3</sup>, Ian D. Small<sup>4</sup>, Xiao Zhong<sup>4</sup> and Matthew D. Barrett<sup>1,2</sup>

<sup>1</sup>School of Biological Sciences, The University of Western Australia, Crawley, Western Australia 6009, Australia

<sup>2</sup>Kings Park and Botanic Garden, Botanic Gardens and Parks Authority, Kings Park, Western Australia 6005, Australia

<sup>3</sup>Australian Research Council Centre for Mine Site Restoration, Curtin University, Bentley, Western Australia 6102, Australia

<sup>4</sup>Australian Research Council Centre of Excellence in Plant Energy Biology, School of Molecular Sciences, The University of Western Australia, Crawley, Western Australia 6009, Australia

<sup>5</sup>Present address: Department of Ecology, Environment and Plant Sciences, Stockholm University, 106 91 Stockholm, Sweden

**Received:** 21 October 2018 **Editorial decision:** 27 February 2019 **Accepted:** 20 March 2019 **Published:** 28 March 2019

**Associate Editor:** Adrian C. Brennan

**Citation:** Anderson BM, Thiele KR, Grierson PF, Krauss SL, Nevill PG, Small ID, Zhong X, Barrett MD. 2019. Recent range expansion in Australian hummock grasses (*Triodia*) inferred using genotyping-by-sequencing. *AoB PLANTS* 11: plz017; doi: 10.1093/aobpla/plz017

**Abstract.** The Australian arid zone (AAZ) has undergone aridification and the formation of vast sandy deserts since the mid-Miocene. Studies on AAZ organisms, particularly animals, have shown patterns of mesic ancestry, persistence in rocky refugia and range expansions in arid lineages. There has been limited molecular investigation of plants in the AAZ, particularly of taxa that arrived in Australia after the onset of aridification. Here we investigate populations of the widespread AAZ grass *Triodia basedowii* to determine whether there is evidence for a recent range expansion, and if so, its source and direction. We also undertake a dating analysis for the species complex to which *T. basedowii* belongs, in order to place its diversification in relation to changes in AAZ climate and landscapes. We analyse a genomic single nucleotide polymorphism data set from 17 populations of *T. basedowii* in a recently developed approach for detecting the signal and likely origin of a range expansion. We also use alignments from existing and newly sequenced plastomes from across Poaceae for analysis in BEAST to construct fossil-calibrated phylogenies. Across a range of sampling parameters and outgroups, we detected a consistent signal of westward expansion for *T. basedowii*, originating in central or eastern Australia. Divergence time estimation indicates that *Triodia* began to diversify in the late Miocene (crown 7.0–8.8 million years (Ma)), and the *T. basedowii* complex began to radiate during the Pleistocene (crown 1.4–2.0 Ma). This evidence for range expansion in an arid-adapted plant is consistent with similar patterns in AAZ animals and likely reflects a general response to the opening of new habitat during aridification. Radiation of the *T. basedowii* complex through the Pleistocene has been associated with preferences for different substrates, providing an explanation why only one lineage is widespread across sandy deserts.

**Keywords:** Arid zone; Australia; biogeography; chloroplast; divergence dating; genotyping-by-sequencing; Poaceae; range expansion; SNPs; *Triodia basedowii* species complex.

\*Corresponding author's e-mail address: [banderson2914@gmail.com](mailto:banderson2914@gmail.com)

© The Author(s) 2019. Published by Oxford University Press on behalf of the Annals of Botany Company.

This is an Open Access article distributed under the terms of the Creative Commons Attribution License (<http://creativecommons.org/licenses/by/4.0/>), which permits unrestricted reuse, distribution, and reproduction in any medium, provided the original work is properly cited.

## Introduction

Large-scale environmental changes such as aridification have shaped and continue to influence the evolution and composition of biomes. As conditions change, organisms may persist in some parts of their ranges, become extinct in others, and/or may migrate into newly available or previously inaccessible ecologically favourable regions. Understanding the drivers behind range shifts and biome assembly can be aided by revealing current patterns of genetic diversity in taxa occupying regions known to have been influenced by geologically recent large-scale environmental changes.

The Australian arid zone (AAZ) provides an excellent location for exploring the influence of continent-scale aridification on biome assembly (reviewed in [Byrne et al. 2008](#)). Since the mid-Miocene c. 16 million years (Ma) ago, climate in inland Australia has shifted from predominantly mesic ([Martin 2006](#)) to current arid conditions (e.g. average annual precipitation less than ~500 mm per year). Concurrently, there has been extensive landform change ([Fujioka and Chappell 2010](#)), leading to the formation of new habitats for AAZ biota. From the onset of the Pleistocene c. 2.6 Ma ([Walker et al. 2012](#)), global glacial cycles began to produce alternately warm/wet and cool/dry conditions in Australia ([Williams 1984](#)), superimposed on a trend of global cooling ([Zachos et al. 2001](#)). The onset of cooling and glacial cycles correspond to the earliest evidence for stony deserts in Australia c. 2–4 Ma ([Fujioka et al. 2005](#)). Beginning roughly 0.8–1.2 Ma, the glacial cycles increased in amplitude and decreased in frequency ([Pisias and Moore 1981](#); [Mudelsee and Stattegger 1997](#); [Clark et al. 1999](#)); this climatic transition coincides with the earliest evidence for sandy dunefields in central Australia c. 1 Ma ([Fujioka et al. 2009](#)), which suggests heightened aridity. Some regional variation is evident within this overall trend, with, for example, drier conditions in north-western Australia from as early as the mid-Miocene ([Groeneveld et al. 2017](#)) followed by the humid interlude c. 5.5–3.3 Ma before a return to arid conditions by 2.4 Ma ([Christensen et al. 2017](#)).

The assembly of the AAZ biome included both taxa that descended from mesic-adapted groups present in Australia before the onset of aridity and taxa that descended from more recent and likely arid-adapted dispersals (see [Crisp and Cook 2013](#)). Often, descendants of mesic groups are restricted to range systems or putative environmental/substrate refugia, e.g. geckos ([Fujita et al. 2010](#); [Oliver et al. 2010, 2014](#); [Pepper et al. 2011a, b](#)), pebble-mimic dragons ([Shoo et al. 2008](#)), blindsnakes ([Marin et al. 2013](#)), grasshoppers ([Kearney and Blacket 2008](#)) and the conifer *Callitris* ([Sakaguchi et al. 2013](#)). In

other cases, descendants of mesic groups have presumably adapted to desert conditions and show evidence of recent range expansions in sandy deserts surrounding the rocky range systems ([Strasburg and Kearney 2005](#); [Kearney and Blacket 2008](#); [Fujita et al. 2010](#); [Pepper et al. 2011b](#)). Descendants of more recent dispersals tend to show a pattern of radiation into the expanding arid zone, with plant examples including chenopods ([Shepherd et al. 2004](#); [Kadereit and Freitag 2011](#)), *Lepidium* ([Mummenhoff et al. 2004](#)), *Triodia* ([Toon et al. 2015](#)) and probably *Ptilotus* ([Hammer et al. 2015](#)). Animal examples include rodents ([Rowe et al. 2008](#)) and elapid snakes ([Keogh et al. 1998](#)), although those radiations occurred across the continent and presumably did not involve pre-adaptation of the entire group to arid conditions.

An outstanding knowledge gap surrounds how AAZ plants, especially recent dispersals with arid ancestry, have responded to climatic and landscape changes since the mid-Miocene and during glacial cycles. Arid-adapted lineages might be expected to respond favourably to cool/dry periods as in, e.g., the Chilean Atacama desert ([Ossa et al. 2013](#)). Evidence to date, however, suggests that cool/dry periods in Australia may have been difficult for the majority of the flora, including the arid-adapted lineages, as evidenced by declines in  $C_4$  grasses around the last glacial maximum in central Australia ([Johnson et al. 1999](#); [Smith 2009](#)) and from dust and pollen records indicating reduced vegetation cover during glacial maxima ([Hesse et al. 2004](#); [Martin 2006](#)). Here we investigate the response of a group of arid-adapted hummock grasses from the AAZ, the *Triodia basedowii* species complex.

Perennial grasses in the genus *Triodia* are iconic Australian plants and dominant components of hummock grasslands, which cover >18 % of the continent ([Department of the Environment and Water Resources 2007](#)). These hummock grasses in general show a wide ecological adaptability and are distributed across some of the driest parts of the continent, extending into tropical savannahs in northern Australia and semi-arid temperate regions in the south ([Lazarides 1997](#)). They are ecologically important and provide food and/or habitat for a variety of animals ([Ealey et al. 1965](#); [Dawson and Bennett 1978](#); [Kitchener et al. 1983](#); [Losos 1988](#); [Morton and James 1988](#); [Daly et al. 2008](#); [Christidis et al. 2010](#); [Laver et al. 2017](#)). *Triodia* is a member of the subfamily Chloridoideae ([Peterson et al. 2010](#)), a group of  $C_4$  grasses thought to have initially diversified in dry habitats in Africa in the Oligocene ([Bouchenak-Khelladi et al. 2010](#)). The closest relatives of *Triodia*, variably recovered as *Aeluropus*, *Orinus* or *Cleistogenes* ([Peterson et al. 2010](#); [Grass Phylogeny Working Group II 2012](#)), occur in

dry or sandy environments from the Mediterranean to Japan (Clayton and Renvoize 1986; Watson and Dallwitz 1992). Ancestors of *Triodia* are thought to have arrived in Australia c. 24–14 Ma (Toon et al. 2015), probably already at least partly adapted to arid conditions.

The *T. basedowii* species complex is found across much of the central AAZ, with the bulk of its diversity in the Pilbara region of north-western Australia (Anderson et al. 2016). Following a recent taxonomic revision (Anderson et al. 2017a), the complex includes nine species: *T. basedowii*, *T. lanigera*, *T. birriliburu*, *T. chichesterensis*, *T. glabra*, *T. mallota*, *T. nana*, *T. scintillans* and *T. vanleeuwenii*. Of these nine species, only *T. basedowii* is widespread across sandy habitats of the AAZ, while many of the others are restricted to discrete geographic areas and substrates. Given the high lineage richness in the Pilbara (Anderson et al. 2016), it might be expected that *T. basedowii* expanded its range eastward from there, but this remains to be tested.

In this study, we examine evidence for range expansion in *T. basedowii* to identify a source area using novel analyses of a previously published genomic single nucleotide polymorphisms (SNPs) data set (Anderson et al. 2017b). In addition, we put the diversification of the *T. basedowii* complex in a temporal context using new and existing chloroplast genomic sequences to relate to climate and landscape changes in the AAZ.

## Materials and Methods

### Range expansion

To evaluate range expansion in *T. basedowii*, we used genomic SNPs obtained from a previously published genotyping-by-sequencing data set (Anderson et al. 2017b). We included 36 samples of *T. basedowii* from 17 populations across its range [see **Supporting Information—Table S1**], along with three samples of *T. birriliburu*, four of *T. nana* and five of *T. glabra* to be used alternately as outgroups for determining ancestral and derived SNP states. Genomic SNP data sets were generated following a modification of a genotyping-by-sequencing approach (Elshire et al. 2011), using primers and barcodes from J. Borevitz (Grabowski et al. 2014). Paired-end reads were assembled using PyRAD v. 3.0.6 (Eaton 2014) based on optimal clustering thresholds determined in Anderson et al. (2017b). The generated data sets consisted of target *T. basedowii* samples as well as samples from one of the outgroups, with SNPs retained only when they were present in at least four samples. SNPs were obtained from two sets of loci: ‘assembled’ loci that had been generated from overlapping reads merged by PEAR (Zhang et al. 2014) and ‘unassembled’ loci that had not, i.e. shorter and longer sequenced

fragments with greater and lesser read depth, respectively (see Anderson et al. 2017b). We used custom Python (Python Software Foundation 2016) scripts to select a single SNP per locus either (i) randomly or (ii) with a bias towards biallelic SNPs with multiple copies of the rare allele. We used a custom R v. 3.2.5 (R Development Core Team 2015) script to filter the resulting data sets to keep only SNPs present in at least one outgroup sample and to format them for the range expansion analyses.

The range expansion analyses implemented here use a measure developed by Peter and Slatkin (2013, 2015) based on the difference in derived allele frequencies for biallelic SNPs between two populations. If a source population extends its range through a series of founder events, it is expected that populations further from the origin of the expansion will have experienced more genetic drift, producing clines in the frequencies of neutral alleles (as alleles are lost with each subsequent founder event), and leading to populations further away from the origin having higher frequencies of derived alleles (Peter and Slatkin 2013). Peter and Slatkin (2013) observed that the measure increased linearly with distance from the origin of an expansion, so it could be used with a time difference of arrival method (Gustafsson and Gunnarsson 2003) to detect the most likely location of the origin of an expansion for a set of populations. The approach has been used to infer origins of expansions in a group of tropical skinks (Potter et al. 2016) and to support similar inferences for monarch butterflies (Zhan et al. 2014), coralsnakes (Streicher et al. 2016), hares (Marques et al. 2017) and zebras (Pedersen et al. 2018). Dr Peter kindly provided scripts implementing these analyses, which we adjusted to fit our data and geographic area of interest. The scripts use the R packages ‘geosphere’ v. 1.5-1 (Hijmans 2015), ‘sp’ v. 1.2-2 (Pebesma and Bivand 2005), ‘rworldmap’ v. 1.3-6 (South 2011), ‘maps’ v. 3.1.0 (Becker et al. 2016) and ‘mapproj’ v. 1.2-4 (McIlroy et al. 2015).

Subsets of the SNP data sets were run through the expansion scripts to assess consistency of any signal of expansion depending on choice of outgroup, inclusion or exclusion of polyploids, numbers of individuals per population and presence of geographic structure. Separate analyses were run for these variations using each of the three outgroup taxa. Some populations of *T. basedowii* are tetraploid and have a slightly higher individual heterozygosity (Anderson et al. 2017b). Given that higher heterozygosity in polyploids could affect a signal based on allele frequencies, we ran analyses including and excluding tetraploid populations. Population sampling was uneven, so we ran the scripts by either (i) randomly choosing a single individual per population for comparison or (ii) allowing the scripts to downsample larger

populations. The expansion scripts assume a single origin; in the case of multiple suspected origins, Peter and Slatkin (2013) recommend estimating which samples are likely to have come from each origin (e.g. using geographic structure) and then applying their method to each group of samples separately. We assessed geographic structure in *T. basedowii* using genomic SNPs in a principal components analysis (PCoA; ‘cmdscale’ function in R) based on Euclidean distances (‘dist’ function in R) between samples. The 8663 SNPs used in the PCoA were obtained using *T. birriliburu* as an outgroup, and were randomly selected from ‘assembled’ loci. Clusters of samples apparent in the PCoA were run separately in the range expansion analyses, in addition to running all samples together. The accuracy of origin detection is reduced and should be interpreted cautiously if the origin is near or beyond the edge of the sampled area (Peter and Slatkin 2013). Initial analyses sometimes recovered the origin at the edge of the area bounded by our sampling, so we broadened the geographic area for detecting the origin.

### Diversification timing

We newly sequenced and assembled 28 Poaceae plastomes and downloaded 26 more from GenBank [see Supporting Information—Table S2] to conduct fossil-calibrated dating analyses across the grasses (data set 1) and within the Chloridoideae (data set 2) using BEAST v. 2.4.6 (Bouckaert et al. 2014). We ran multiple analyses to assess the impact of calibration, model choice and alignment length. We evaluated results based on two placements of controversial early grass fossils (Prasad et al. 2005, 2011; see Christin et al. 2014). Clock models included the relaxed uncorrelated log-normal (UCLN; Drummond et al. 2006) and a random local clocks model (RLC; Drummond and Suchard 2010). Further details of the sequencing and analyses are included in Supporting Information.

## Results

### Range expansion

Across multiple analyses we recovered a consistent signal of westward expansion for *T. basedowii* (a subset is shown in Fig. 1; see also Supporting Information—Table S3), regardless of outgroup choice, inclusion or exclusion of polyploids, or sampling of genomic SNPs. The origin was variously resolved in central or eastern Australia, sometimes outside the current known range of *T. basedowii*. While the precise location of the inferred origin was not consistent, the analyses only recovered the origin in the eastern portion of the study area.

To evaluate the possibility of multiple expansion origins, we examined geographic structure within *T. basedowii* in a PCoA (Fig. 2). There was strong evidence for geographic clustering, with three clearly distinct groups of samples: a ‘western’ group focused near the Pilbara, an ‘eastern’ group in central Australia and an ‘intermediate’ group distributed between these two. Running the range expansion analyses on the groups separately did not recover significant ( $P < 0.01$ ) signals of expansion compared to isolation by distance [see Supporting Information—Table S3], with a single exception for the eastern group. In almost all analyses, significant signals of expansion were only detected for all samples combined.

### Diversification timing

Phylogenetic relationships within Poaceae were recovered [see Supporting Information—Figs S1–S4] consistent with current understanding of grass evolution (Grass Phylogeny Working Group II 2012; Soreng et al. 2015) and node ages for most major splits (Table 1; see Supporting Information—Fig. S5) were comparable to estimates from recent studies (Prasad et al. 2011; Christin et al. 2014; Burke et al. 2016). Estimated node ages within Chloridoideae (Table 2; Fig. 3) indicate that *Triodia* began to diversify in the late Miocene (7.9 Ma; 7.0–8.8 Ma 95 % highest posterior density interval [HPD]), and that the *T. basedowii* complex began to radiate in the Pleistocene (2.3 Ma; 1.9–2.7 Ma 95 % HPD). Alternative placement of the controversial fossils had minimal impact [see Supporting Information—Table S6] on the crown age of the complex (1.7 Ma; 1.4–2.0 Ma 95 % HPD), and still indicated a Pleistocene radiation.

## Discussion

### Expansion of *T. basedowii* across the sandy dunefields

Our results indicate that *T. basedowii* has undergone a recent east-to-west range expansion, with the origin most likely in central or eastern Australia. This finding augments an increasing number of studies indicating recent range expansions in AAZ lineages (e.g. Kearney and Blacket 2008; Fujita et al. 2010; Pepper et al. 2011b). While arid conditions in Australia have a history dating back to the Miocene, the more recent heightened aridity and formation of sandy dunefields c. 1 Ma (Fujioka et al. 2009) are likely to have created a widespread and relatively open niche onto which AAZ organisms with adaptations for sandy environments could expand. Geographic structuring in the *T. basedowii* complex (see Anderson et al. 2016) is strongly associated

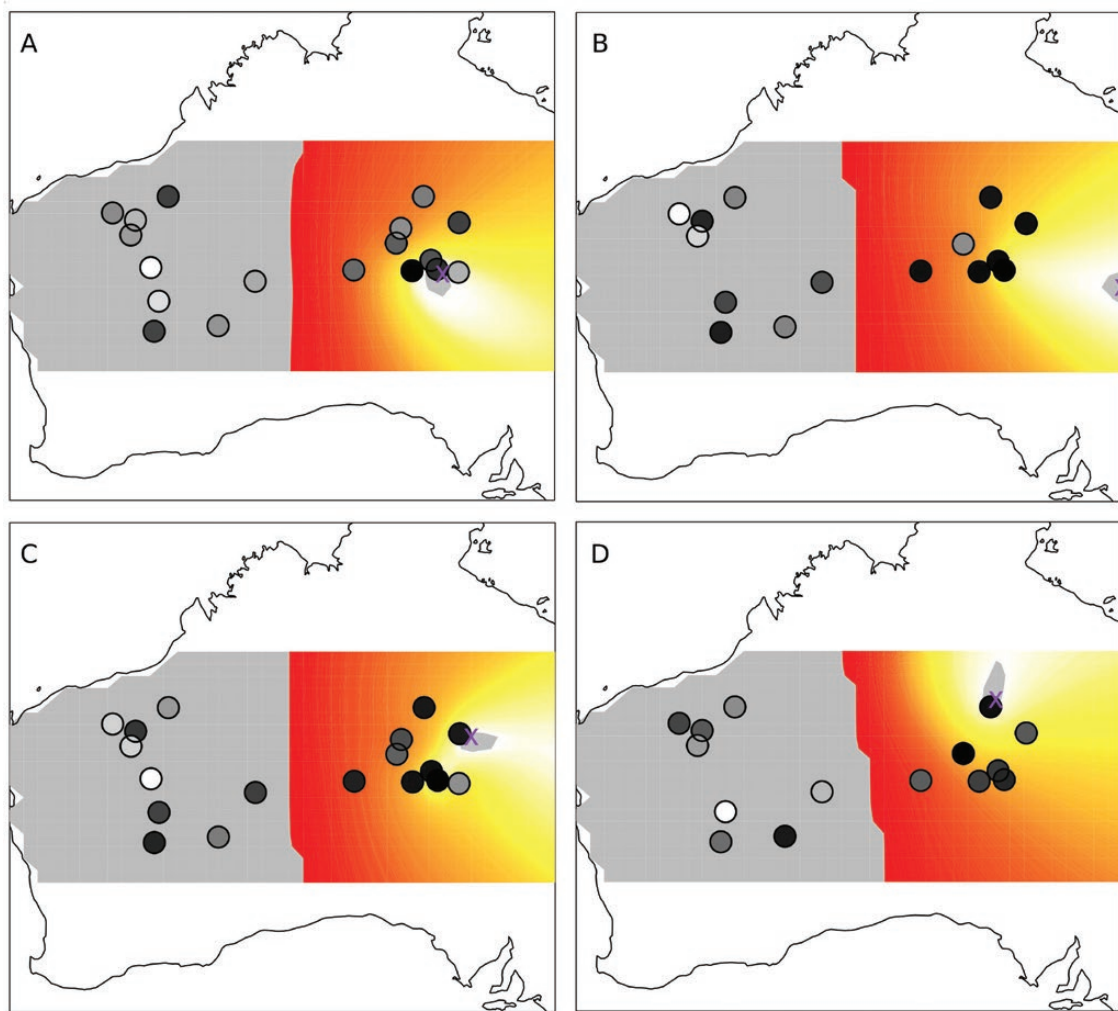

**Figure 1.** Some of the results of range expansion analyses for *Triodia basedowii* using different genomic SNP subsets. Ancestral states of SNPs were determined using *T. birriliburu* (A, B), *T. nana* (C) or *T. glabra* (D) as outgroups. Loci sets were assembled (A, C), unassembled (D) or a combination of the two (B). SNPs were chosen randomly (A, D) or with a bias towards SNPs with multiple copies of the rare allele (B, C). Population sampling was one per population (A), one per population excluding tetraploids (D), all samples (C) and all samples excluding tetraploids (B). Panels show heat maps and probable locations of the origin of range expansion (purple 'X'). Populations are indicated with circles, where darker shades show higher heterozygosity.

with substrate differences, and species now associated with rockier areas tend to grow poorly when cultivated in sand (e.g. *T. vanleeuwenii*; P. F. Grierson, University of Western Australia, unpubl. res.). Substrate has been implicated as a factor limiting the distributions of other AAZ organisms, principally as rocky refugial areas separated by inhospitable sandy habitat (e.g. Shoo et al. 2008; Oliver et al. 2014). We hypothesize that much of the AAZ flora with similar widespread distributions across sandy regions will show evidence of recent range expansion, and that elements of the AAZ flora with sand affinities will have lower lineage richness than their sister groups in rocky areas, given the relatively young age of the sandy deserts. Both these hypotheses require further investigation.

While the pairwise signal for expansion between populations varied across sampling schemes, the consistency of an east-to-west signal suggests that the Pilbara, at the western end of the range of the species, was not a source area for *T. basedowii* prior to its expansion across sandy dunefields. Previous work on the *T. basedowii* complex (Anderson et al. 2016) found no evidence for a refugium in central Australia, but was unable to look at diversity within *T. basedowii* populations. Based on the findings of the present study, we suggest that the Central Ranges or some other region of central Australia may have maintained populations of *T. basedowii* during the formation of the sandy dunefields and/or through Pleistocene glacial cycles. Our findings of a population expansion from eastern or central Australia also

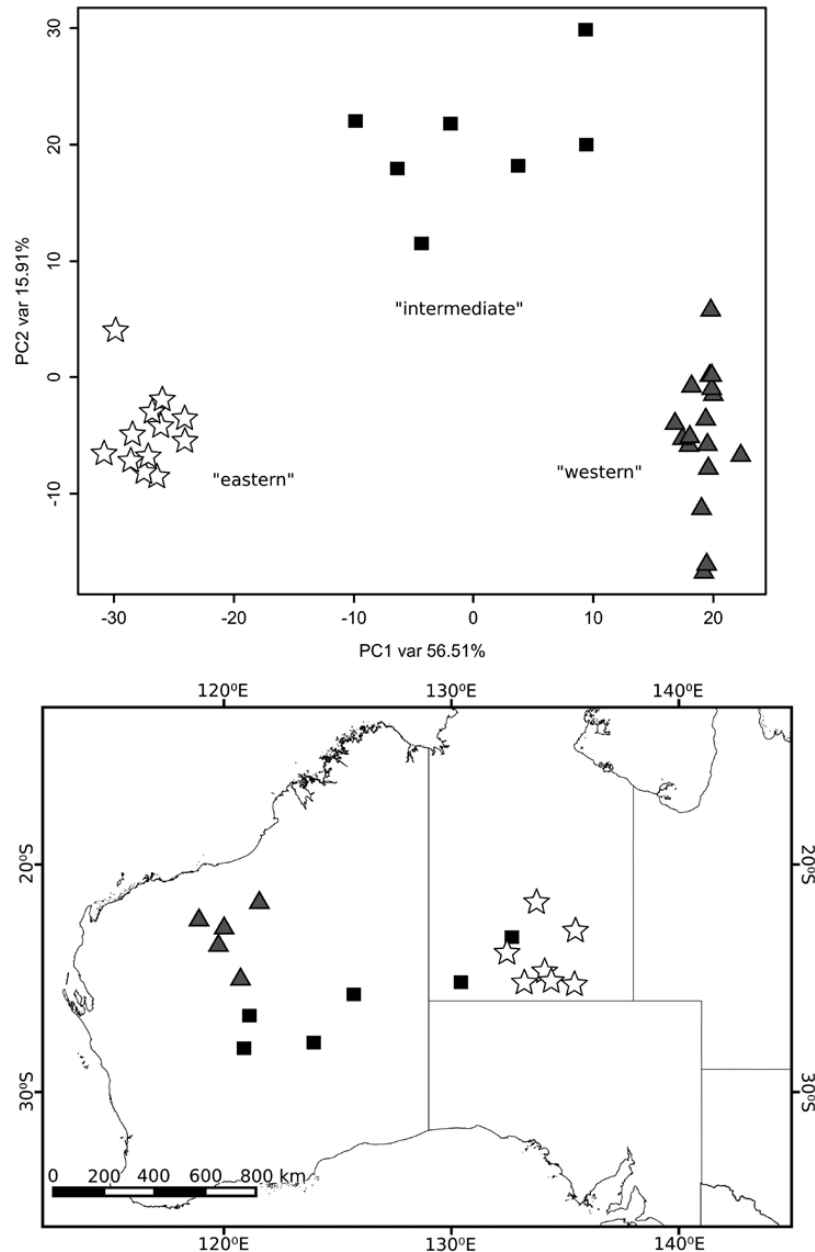

**Figure 2.** Principal components analysis (PCoA) of genomic SNPs from individual plants of *Triodia basedowii*. Population localities are shown on the map with symbols reflecting their grouping in the PCoA.

imply that Pilbara populations of *T. basedowii*, which are restricted to the sandy Fortescue River valley, are relatively recent incursions. These recent incursions may explain examples of hybridization with Pilbara species. One example of possible introgression involves *T. lanigera*, which based on genomic SNP data (Anderson et al. 2017b) is part of a different clade and closely related to *T. chichesterensis*, but which has an internal transcribed spacer (ITS) sequence highly similar to that of *T. basedowii* (Anderson et al. 2016). This pattern of ITS introgression in the absence of genomic mixing has previously been observed in a mixed population of *T. lanigera* and

*T. chichesterensis*, the individuals of which shared ITS copies but were well differentiated across thousands of genomic SNPs (Anderson et al. 2017b).

The demographic history of *T. basedowii* is likely more complex than the single point source of expansion assumed by the model of Peter and Slatkin (2013), as some populations may have diverged prior to acting as sources for others. Across most sampling schemes, however, we failed to detect significant signals of expansion from individual geographic groups. The geographic structure in *T. basedowii* suggests a level of differentiation, perhaps due to periods of minimal genetic exchange following

**Table 1.** Node ages (Ma) from analysis of data set 1 compared to previous molecular dating of the grasses. Node ages from Prasad et al. (2011) are with placement of the phytoliths at stem Oryzae (their H1), while those from Christin et al. (2014) are based on their BEAST analysis of chloroplast data from across angiosperms, which included the placement of the phytoliths at stem Oryzae. HPD is the highest posterior density interval.

| Study               | Current study |           | Prasad et al. (2011) |           | Christin et al. (2014) |           | Burke et al. (2016) |           |
|---------------------|---------------|-----------|----------------------|-----------|------------------------|-----------|---------------------|-----------|
|                     | Age           | 95 % HPD  | Age                  | 95 % HPD  | Age                    | 95 % HPD  | Age                 | 95 % HPD  |
| Crown Poaceae       | 123           | 119–125   | 121                  | 95.9–149  | 88.5                   | 80.9–97.8 | 106                 | 99.5–110  |
| Crown BOP + PACMAD  | 82.4          | 78.5–86.5 | 81.6                 | 69.6–93.8 | 74.5                   | 70.3–80   | 85.7                | 75.7–97.6 |
| Crown Oryzoideae    | 65.6          | 65–66.6   | 67.1                 | 56.9–77   | 68                     | 67–70.8   | 72.9                | 66–87.9   |
| Crown Bambusoideae  | 50            | 40.9–59   | 47.4                 | 36.5–59.7 | 34.2                   | 19.8–56.2 | 41.5                | 2.9–63.8  |
| Crown Pooideae      | 60.1          | 55.1–65.2 | 57.8                 | 48.2–67.6 | 59.9                   | 51.4–68.5 | 62.9                | 50.1–75.7 |
| Crown Chloridoideae | 41.7          | 38.1–45.7 | 33.6                 | 24.5–42.5 | 41.2                   | 33.2–49   | 37.3                | 22.6–52.7 |

**Table 2.** Node ages (Ma) from analyses of data set 2. Node ages from Toon et al. (2015) are shown for comparison. HPD is the highest posterior density interval, RLC is a random local clocks model and UCLN is an uncorrelated log-normal clock model.

| Node               | Stem <i>Triodia</i> |           | Crown <i>Triodia</i> |           | Crown <i>T. basedowii</i> complex |           |
|--------------------|---------------------|-----------|----------------------|-----------|-----------------------------------|-----------|
|                    | Age                 | 95 % HPD  | Age                  | 95 % HPD  | Age                               | 95 % HPD  |
| RLC                | 20.2                | 18.4–22.2 | 7.89                 | 6.98–8.82 | 2.29                              | 1.91–2.70 |
| UCLN               | 18.1                | 15.9–20.5 | 5.62                 | 4.86–6.39 | 1.58                              | 1.29–1.87 |
| <i>matK</i> only   | 19.8                | 11.9–28.0 | 10.4                 | 5.50–17.2 | 3.8                               | 1.29–7.36 |
| Toon et al. (2015) | 20.9                | 17.9–23.5 | 14.7                 | 11.4–18.3 | 4.58                              | 2.60–6.86 |

an initial expansion (possibly during glacial maxima) or through ongoing isolation by distance. Recently, a simulation study (He et al. 2017) has challenged the reliability of the analyses we used for detecting an origin when the underlying heterogeneity of the environment through time is not taken into account. This is a particular challenge for researchers working in the AAZ, as our knowledge of the extent of suitable habitat for AAZ species since the mid-Miocene is poor (e.g. the extent of sandy dunefields through the Pleistocene). In the case of *Triodia*, with its varied substrate preferences across species, it is an additional challenge to predict large-scale suitability when species turnover can be at a fine scale in the landscape. Our sampling of *T. basedowii* (36 samples across 17 locations) is low compared to many population genetics studies, but similar sampling has been used with this approach (e.g. Potter et al. 2016; Streicher et al. 2016), and limitations in statistical power from lower sampling of individuals are partly offset by the large number of markers in comparisons (~2000–7000; see Supporting Information—Table S3; e.g. Willing et al. 2012). The variability in the location of the origin in our analyses suggests limitations of the method and/or the completeness of our genomic SNP sampling, as

genotyping-by-sequencing data sets are characterized by high levels of missing data. While these challenges raise uncertainty as to the precise location of an origin, the finding of a consistent large-scale pattern of westward expansion remains robust.

### Diversification timing in the *T. basedowii* complex

Our dating analyses provide a new estimate for the timing of diversification in *Triodia* and the *T. basedowii* complex. We estimate that ancestors of *Triodia* diverged from their Asian relatives ~20 Ma, subsequently migrated to Australia and had begun to diversify by the late Miocene c. 8 Ma. Extant diversity in the *T. basedowii* complex arose from a crown radiation that began about 1.9–2.7 Ma in the Pleistocene and continued through glacial cycles and the climatic transition c. 1 Ma that led to the formation of sandy dunefields. This finding contrasts with patterns seen in some AAZ lineages that have a mesic ancestry, where species divergences often date to the Miocene, and Pleistocene glacial cycles appear to have affected phylogeographic structure rather than speciation (Byrne et al. 2008; e.g. Pepper et al. 2011b; Marin et al. 2013). A recent study by Toon et al. (2015) had limited sampling of the *T. basedowii* complex and indicated a somewhat

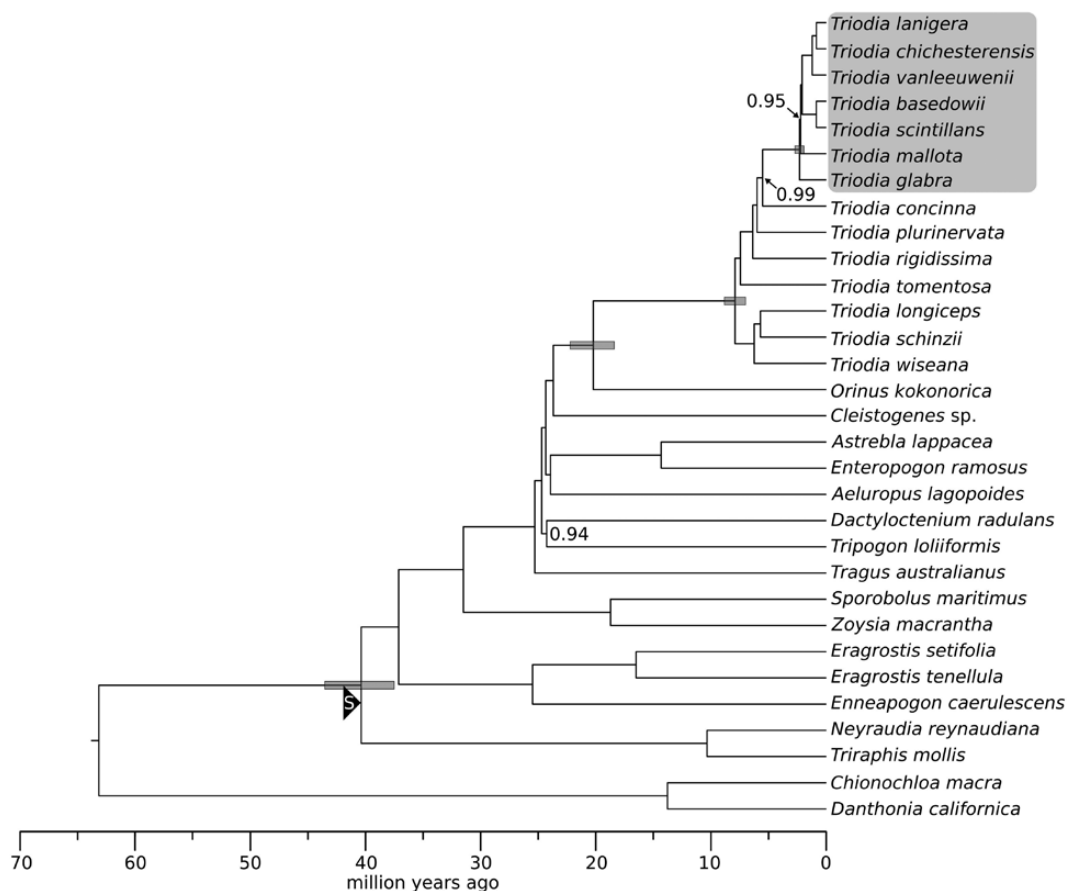

**Figure 3.** Chronogram from the BEAST analysis of data set 2, comprising chloroplast alignments with a focus on Chloridoideae and *Triodia*, with two outgroup samples from Danthonioideae. The secondary calibration from the analysis of data set 1 is indicated by the ‘S’ in a black triangle. Node bars for selected nodes of interest are 95 % highest posterior density intervals. Node support values are posterior probabilities and are shown for values <1.00. The *Triodia basedowii* complex is shaded at the top right.

older crown radiation in the Pliocene (see Table 2). Discrepancies between our dates and those of Toon et al. (2015) may be the result of data set size (chloroplast vs. ITS + *matK*) and/or sampling effects. Sparser sampling (as in our data set) may produce node density effects (see Heath et al. 2008; S. Y. Ho, University of Sydney, Australia, pers. comm.), but undersampling of a specific clade is not expected to affect the age of the subtending node (see Linder et al. 2005). In addition, the lack of other members of *Triodia* (such as a potentially faster evolving northern group) in our data set might have biased the age of the crown to be younger (see Beaulieu et al. 2015). Regardless, using either their or our date at least rules out rapid radiation of the complex since the earliest evidence of sandy dunefields c. 1 Ma (Fujioka et al. 2009).

### Synthesis: historical biogeography of the *T. basedowii* complex

Since the ancestors of *Triodia* arrived in Australia, probably around the mid-Miocene and in the south-west of the continent, major clades have diverged as the

genus spread northwards (Toon et al. 2015). The clade to which the *T. basedowii* complex belongs diverged prior to the bulk of diversification in *Triodia* and currently occupies areas in central Australia, between and overlapping the distributions of (older) southern and (more recently diverged) northern clades. The two closest relatives of the *T. basedowii* complex (*T. plurinervata* and *T. concinna*) are currently distributed on the west coast and in the central interior of Western Australia (Anderson et al. 2017a), suggesting that ancestors of the *T. basedowii* complex likely occurred in central and western Western Australia.

While phylogenetic relationships in the complex remain partly unresolved, analyses of genomic data (Anderson et al. 2017b) indicate two main groups in the complex (Fig. 4): a western group (*T. mallota*, *T. glabra*, *T. lanigera* and *T. chichesterensis*) and an eastern group (*T. basedowii*, *T. birriliburu*, *T. vanleeuwenii*, *T. scintillans* and *T. nana*). Some of these relationships are supported by the chloroplast data presented in this study, although *T. vanleeuwenii* samples have been found with



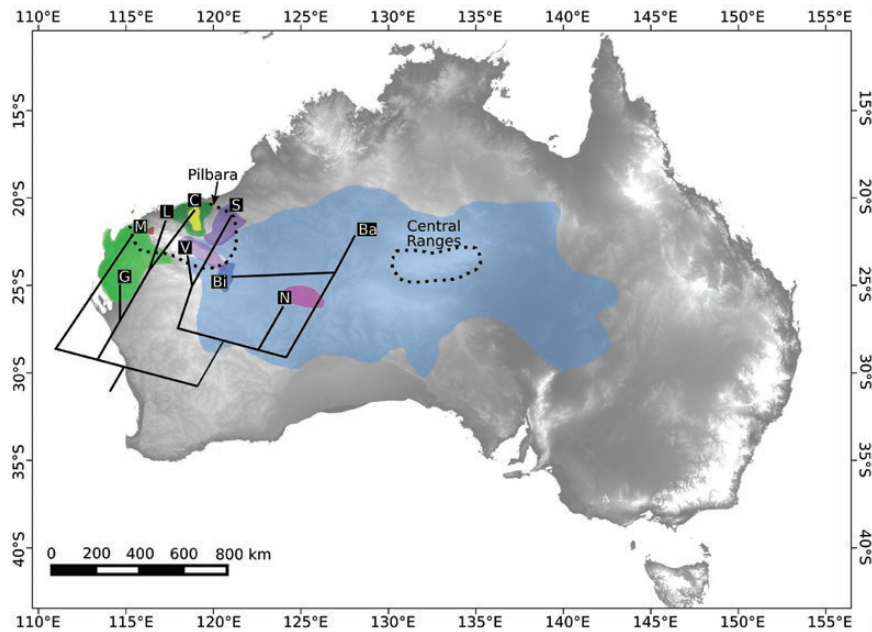

**Figure 4.** Current distributions of taxa in the *Triodia basedowii* complex, with phylogenetic relationships superimposed. Two putative refugia, the Pilbara and the Central Ranges, are labelled and denoted with dotted lines. Taxa are denoted by letters, where G: *T. glabra*, M: *T. mallota*, L: *T. lanigera*, C: *T. chichesterensis*, V: *T. vanleeuwenii*, S: *T. scintillans*, Bi: *T. birriliburu*, N: *T. nana* and Ba: *T. basedowii*.

both of the two main chloroplast haplotypes, possibly due to chloroplast capture or incomplete lineage sorting (Anderson et al. 2016). We speculate that early divergences in the complex included a split between predominantly western and eastern lineages.

Substrate and potentially ecological differentiation have probably influenced divergences in the complex (Anderson et al. 2016). Western lineages may have diversified along the west coast of the continent and into the northern Pilbara (see Fig. 4), regions that currently have different substrates (sandy coastal plains vs. gravelly plains). Current habitat preferences of allopatric *T. glabra* (sandy) compared to *T. chichesterensis* (gravelly) suggest ecological differentiation may have developed over time in isolation, while the contrasting sympatric pattern of *T. lanigera* and *T. chichesterensis* (less pronounced substrate preferences) might be explained by divergence in isolation. Eastern lineages, too, show strong substrate preference differences, with three species that are largely restricted to rocky substrates (*T. vanleeuwenii*, *T. scintillans* and *T. nana*) and two that are found on sandy substrates (*T. basedowii* and *T. birriliburu*). The extent of sandy habitats prior to the formation of the dunefields c. 1 Ma is currently unknown, and it is possible that the ancestors of the sand specialists had available habitat in central Australia. We speculate that the eastern lineage split into a sandy lineage and a rocky lineage, the latter occupying rocky habitats and entering the south-east Pilbara.

The timing of the restriction of *T. basedowii* to central or eastern Australia is unclear, though climatic changes around the formation of the sandy dunefields c. 1 Ma could be reasonably implicated. Whether the split of *T. basedowii* from its sister *T. birriliburu* was coincident with that isolation or occurred after a later expansion from the east is also not clear. The westward expansion of *T. basedowii* across new sandy habitat may reflect an initial colonization of the dunefields followed by persistence through glacial cycles, or possibly a series of range expansions, with regional genetic differentiation from range restrictions or isolation by distance.

Despite the lack of precision around the timing of evolutionary events in the *T. basedowii* complex, distribution patterns illustrate that lineages have responded variably to the effects of aridity and associated landscape changes. Even among these close relatives, some are restricted to narrow ranges associated with specific rocky substrates, while others have adapted to expand onto newer sandy dunefield habitats, ultimately occupying vast areas of inland Australia. Future discoveries around the extent and types of habitats and substrates available to plants in the AAZ, and the amount of vegetation cover, from the onset of aridity in the mid-Miocene through Plio-Pleistocene climate changes will improve our understanding of adaptation, colonization and evolution within the AAZ.

## Sources of Funding

This work was supported by the Australian Research Council (Linkage Project LP120100350 to CIs Grierson, Krauss et al. in collaboration with Rio Tinto Iron Ore, Chevron Australia Pty Ltd, Botanic Gardens and Parks Authority and the Department of Parks and Wildlife to P.F.G., S.L.K., Charles Price, Kingsley Dixon, and K.R.T.); an ANZ Trustees Foundation—Holsworth Wildlife Research Endowment to B.M.A.; and the University of Western Australia (International Postgraduate Research Scholarship, Australian Postgraduate Award and a UWA Top-up scholarship to B.M.A.).

## Conflict of Interest

None declared.

## Contributions by the Authors

B.M.A. and M.D.B. conceived the study; B.M.A., M.D.B., K.R.T., and P.G.N. collected genetic material; P.G.N. and M.D.B. sequenced chloroplast genomes; I.D.S., X.Z., and M.D.B. assembled chloroplast genomes; I.D.S., X.Z., and M.D.B. annotated chloroplast genomes; B.M.A. wrote the scripts and analysed the data; P.F.G., S.L.K., K.R.T., M.D.B., and B.M.A. interpreted results; B.M.A. led the writing.

## Acknowledgements

We thank S. van Leeuwen, N. Gibson, M. Langley, K. Brown, P. Jobson and R. Davis for assistance with fieldwork, and E. Mayence for collecting a sample of *T. plurinervata* from the Shark Bay area. We thank M. Duvall for providing an assembly of a previously sequenced *T. vanleeuwenii* chloroplast, and N. Dierckxsens for providing a beta-test version of NOVOPlasty. M. Gardner and the staff of the Australian Genome Research Facility are thanked for running the shotgun sequencing.

## Supporting Information

Supporting information may be found in the online version of this article, and includes the following: (i) Sampling (Tables S1 and S2), range expansion results (Table S3) and additional details for divergence dating analyses (including Tables S4–S6 and Figs S1–S5); (ii) chloroplast alignments for data sets 1 and 2; and (iii) custom scripts.

Demultiplexed genotyping-by-sequencing reads are available on the NCBI Sequence Read Archive (SRA) under BioProject PRJNA350598, samples SAMN05942208–SAMN05942351.

GenBank accession numbers for newly sequenced chloroplasts are included in Table S2.

## Literature Cited

- Anderson BM, Barrett MD, Krauss SL, Thiele K. 2016. Untangling a species complex of arid zone grasses (*Triodia*) reveals patterns congruent with co-occurring animals. *Molecular Phylogenetics and Evolution* **101**:142–162.
- Anderson BM, Thiele KR, Barrett MD. 2017a. A revision of the *Triodia basedowii* species complex and close relatives (Poaceae: Chloridoideae). *Australian Systematic Botany* **30**:197–229.
- Anderson BM, Thiele KR, Krauss SL, Barrett MD. 2017b. Genotyping-by-sequencing in a species complex of Australian hummock grasses (*Triodia*): methodological insights and phylogenetic resolution. *PLoS One* **12**:e0171053.
- Beaulieu JM, O'Meara BC, Crane P, Donoghue MJ. 2015. Heterogeneous rates of molecular evolution and diversification could explain the Triassic age estimate for angiosperms. *Systematic Biology* **64**:869–878.
- Becker RA, Wilks AR, Brownrigg R, Minka TP, Deckmyn A. 2016. *maps: draw geographical maps. R package version 3.1.0.* <https://cran.r-project.org/package=maps>
- Bouchenak-Khelladi Y, Verboom GA, Savolainen V, Hodkinson TR. 2010. Biogeography of the grasses (Poaceae): a phylogenetic approach to reveal evolutionary history in geographical space and geological time. *Botanical Journal of the Linnean Society* **162**:543–557.
- Bouckaert R, Heled J, Kühnert D, Vaughan T, Wu CH, Xie D, Suchard MA, Rambaut A, Drummond AJ. 2014. BEAST 2: a software platform for Bayesian evolutionary analysis. *PLoS Computational Biology* **10**:e1003537.
- Burke SV, Lin CS, Wysocki WP, Clark LG, Duvall MR. 2016. Phylogenomics and plastome evolution of tropical forest grasses (*Leptaspis*, *Streptochaeta*: Poaceae). *Frontiers in Plant Science* **7**:1993.
- Byrne M, Yeates DK, Joseph L, Kearney M, Bowler J, Williams MA, Cooper S, Donnellan SC, Keogh JS, Leys R, Melville J, Murphy DJ, Porch N, Wyrwoll KH. 2008. Birth of a biome: insights into the assembly and maintenance of the Australian arid zone biota. *Molecular Ecology* **17**:4398–4417.
- Christensen BA, Renema W, Henderiks J, De Vleeschouwer D, Groeneveld J, Castañeda IS, Reuning L, Bogus K, Auer G, Ishiwa T, McHugh CM, Gallagher SJ, Fulthorpe CS, Mamo BL, Kominz MA, McGregor HV, Petrick BF, Takayanagi H, Levin E, Korpanty CA, Potts DC, Baranwal S, Franco DR, Gurnis M, Haller C, He Y, Himmler T, Iwatani H, Jatiningrum RS, Lee EY, Rastigar A, Zhang W. 2017. Indonesian throughflow drove Australian climate from humid Pliocene to arid Pleistocene. *Geophysical Research Letters* **44**:6914–6925.
- Christidis L, Rheindt FE, Boles WE, Norman JA. 2010. Plumage patterns are good indicators of taxonomic diversity, but not of phylogenetic affinities, in Australian grasswrens *Amytornis* (Aves: Maluridae). *Molecular Phylogenetics and Evolution* **57**:868–877.
- Christin PA, Spriggs E, Osborne CP, Strömberg CA, Salamin N, Edwards EJ. 2014. Molecular dating, evolutionary rates, and the age of the grasses. *Systematic Biology* **63**:153–165.

- Clark PU, Alley RB, Pollard D. 1999. Northern Hemisphere ice-sheet influences on global climate change. *Science* **286**:1104–1111.
- Clayton WD, Renvoize SA. 1986. *Genera graminum. Grasses of the world*. London: HMSO.
- Crisp MD, Cook LG. 2013. How was the Australian flora assembled over the last 65 million years? A molecular phylogenetic perspective. *Annual Review of Ecology, Evolution, and Systematics* **44**:303–324.
- Daly BG, Dickman CR, Crowther MS. 2008. Causes of habitat divergence in two species of agamid lizards in arid central Australia. *Ecology* **89**:65–76.
- Dawson WR, Bennett AF. 1978. Energy metabolism and thermoregulation of the spectacled hare wallaby (*Lagorchestes conspicillatus*). *Physiological Zoology* **51**:114–130.
- Department of the Environment and Water Resources. 2007. *Australia's native vegetation: a summary of Australia's major vegetation groups, 2007*. Canberra, ACT: Australian Government.
- Drummond AJ, Ho SY, Phillips MJ, Rambaut A. 2006. Relaxed phylogenetics and dating with confidence. *PLoS Biology* **4**:e88.
- Drummond AJ, Suchard MA. 2010. Bayesian random local clocks, or one rate to rule them all. *BMC Biology* **8**:114.
- Ealey E, Bentley PJ, Main AR. 1965. Studies on water metabolism of the hill kangaroo, *Macropus robustus* (Gould), in northwest Australia. *Ecology* **46**:473–479.
- Eaton DAR. 2014. PyRAD: assembly of *de novo* RADseq loci for phylogenetic analyses. *Bioinformatics* **30**:1844–1849.
- Elshire RJ, Glaubitz JC, Sun Q, Poland JA, Kawamoto K, Buckler ES, Mitchell SE. 2011. A robust, simple genotyping-by-sequencing (GBS) approach for high diversity species. *PLoS One* **6**:e19379.
- Fujioka T, Chappell J. 2010. History of Australian aridity: chronology in the evolution of arid landscapes In: Bishop P, Pillans B, eds. *Australian landscapes*. London: The Geological Society of London, 121–139.
- Fujioka T, Chappell J, Honda M, Yatsevich I, Fifield K, Fabel D. 2005. Global cooling initiated stony deserts in central Australia 2–4 Ma, dated by cosmogenic  $^{21}\text{Ne}$ – $^{10}\text{Be}$ . *Geology* **33**:993–996.
- Fujioka T, Chappell J, Keith Fifield L, Rhodes EJ. 2009. Australian desert dune fields initiated with Pliocene–Pleistocene global climatic shift. *Geology* **37**:51–54.
- Fujita MK, McGuire JA, Donnellan SC, Moritz C. 2010. Diversification and persistence at the arid-monsoonal interface: Australia-wide biogeography of the Bynoe's gecko (*Heteronotia binoei*; Gekkonidae). *Evolution* **64**:2293–2314.
- Grabowski PP, Morris GP, Casler MD, Borevitz JO. 2014. Population genomic variation reveals roles of history, adaptation and ploidy in switchgrass. *Molecular Ecology* **23**:4059–4073.
- Grass Phylogeny Working Group II. 2012. New grass phylogeny resolves deep evolutionary relationships and discovers  $C_4$  origins. *The New Phytologist* **193**:304–312.
- Greenveild J, Henderiks J, Renema W, McHugh CM, De Vleeschouwer D, Christensen BA, Fulthorpe CS, Reuning L, Gallagher SJ, Bogus K, Auer G, Ishiwa T; Expedition 356 Scientists. 2017. Australian shelf sediments reveal shifts in Miocene Southern Hemisphere westerlies. *Science Advances* **3**:e1602567.
- Gustafsson F, Gunnarsson F. 2003. Positioning using time-difference of arrival measurements. In: Proceedings of the 2003 IEEE International Conference on Acoustics, Speech, and Signal Processing (ICASSP '03). Hong Kong, China: The Institute of Electrical and Electronics Engineers (IEEE), VI-553–556.
- Hammer T, Davis R, Thiele K. 2015. A molecular framework phylogeny for *Ptilotus* (Amaranthaceae): evidence for the rapid diversification of an arid Australian genus. *Taxon* **64**:272–285.
- He Q, Prado JR, Knowles LL. 2017. Inferring the geographic origin of a range expansion: latitudinal and longitudinal coordinates inferred from genomic data in an ABC framework with the program x-origin. *Molecular Ecology* **26**:6908–6920.
- Heath TA, Hedtke SM, Hillis DM. 2008. Taxon sampling and the accuracy of phylogenetic analyses. *Journal of Systematics and Evolution* **46**:239–257.
- Hesse PP, Magee JW, van der Kaars S. 2004. Late Quaternary climates of the Australian arid zone: a review. *Quaternary International* **118–119**:87–102.
- Hijmans RJ. 2015. *geosphere: spherical trigonometry. R package version 1.5-1*. <https://cran.r-project.org/package=geosphere>
- Johnson BJ, Miller GH, Fogel ML, Magee JW, Gagan MK, Chivas AR. 1999. 65,000 years of vegetation change in central Australia and the Australian summer monsoon. *Science* **284**:1150–1152.
- Kadereit G, Freitag H. 2011. Molecular phylogeny of Camphorosmeae (Camphorosmoideae, Chenopodiaceae): implications for biogeography, evolution of  $C_4$ -photosynthesis and taxonomy. *Taxon* **60**:51–78.
- Kearney M, Blacket MJ. 2008. The evolution of sexual and parthenogenetic *Warramaba*: a window onto Plio-Pleistocene diversification processes in an arid biome. *Molecular Ecology* **17**:5257–5275.
- Keogh JS, Shine R, Donnellan S. 1998. Phylogenetic relationships of terrestrial Australo-Papuan elapid snakes (subfamily Hydrophiinae) based on cytochrome b and 16S rRNA sequences. *Molecular Phylogenetics and Evolution* **10**:67–81.
- Kitchener DJ, Stoddart J, Henry J. 1983. A taxonomic appraisal of the genus *Ningau* Archer (Marsupialia: Dasyuridae), including description of a new species. *Australian Journal of Zoology* **31**:361–379.
- Laver RJ, Nielsen SV, Rosauer DF, Oliver PM. 2017. Trans-biome diversity in Australian grass-specialist lizards (Diplodactylidae: *Strophurus*). *Molecular Phylogenetics and Evolution* **115**:62–70.
- Lazarides M. 1997. A revision of *Triodia* including *Plectrachne* (Poaceae, Eragrostideae, Triodiinae). *Australian Systematic Botany* **10**:381–489.
- Linder HP, Hardy CR, Rutschmann F. 2005. Taxon sampling effects in molecular clock dating: an example from the African Restionaceae. *Molecular Phylogenetics and Evolution* **35**:569–582.
- Losos JB. 1988. Thermoregulatory correlates of escape behavior by a desert lizard, *Ctenophorus isolepis*. *Journal of Herpetology* **22**:353–356.
- Marin J, Donnellan SC, Hedges SB, Doughty P, Hutchinson MN, Cruaud C, Vidal N. 2013. Tracing the history and biogeography of the Australian blindsnake radiation. *Journal of Biogeography* **40**:928–937.
- Marques JP, Farelo L, Vilela J, Vanderpool D, Alves PC, Good JM, Boursot P, Melo-Ferreira J. 2017. Range expansion underlies historical introgressive hybridization in the Iberian hare. *Scientific Reports* **7**:40788.
- Martin HA. 2006. Cenozoic climatic change and the development of the arid vegetation in Australia. *Journal of Arid Environments* **66**:533–563.

- McIlroy D, Brownrigg R, Minka TP, Bivand R. 2015. *mapproj: map projections. R package version 1.2-4*. <https://cran.r-project.org/package=mapproj>
- Morton SR, James SD. 1988. The diversity and abundance of lizards in arid Australia: a new hypothesis. *The American Naturalist* **132**:237–256.
- Mudelsee M, Statterger K. 1997. Exploring the structure of the mid-Pleistocene revolution with advanced methods of time-series analysis. *Geologische Rundschau: Zeitschrift für Allgemeine Geologie* **86**:499–511.
- Mummenhoff K, Linder P, Friesen N, Bowman JL, Lee JY, Franzke A. 2004. Molecular evidence for bicontinental hybridogenous genomic constitution in *Lepidium sensu stricto* (Brassicaceae) species from Australia and New Zealand. *American Journal of Botany* **91**:254–261.
- Oliver PM, Adams M, Doughty P. 2010. Molecular evidence for ten species and Oligo-Miocene vicariance within a nominal Australian gecko species (*Crenadactylus ocellatus*, Diplodactylidae). *BMC Evolutionary Biology* **10**:386.
- Oliver PM, Smith KL, Laver RJ, Doughty P, Adams M. 2014. Contrasting patterns of persistence and diversification in vicars of a widespread Australian lizard lineage (the *Oedura marmorata* complex). *Journal of Biogeography* **41**:2068–2079.
- Ossa PG, Pérez F, Armesto JJ. 2013. Phylogeography of two closely related species of *Nolana* from the coastal Atacama Desert of Chile: post-glacial population expansions in response to climate fluctuations. *Journal of Biogeography* **40**:2191–2203.
- Pebesma EJ, Bivand RS. 2005. Classes and methods for spatial data in R. *R News* **5**:9–13.
- Pedersen CT, Albrechtsen A, Etter PD, Johnson EA, Orlando L, Chikhi L, Siegismund HR, Heller R. 2018. A southern African origin and cryptic structure in the highly mobile plains zebra. *Nature Ecology & Evolution* **2**:491–498.
- Pepper M, Fujita MK, Moritz C, Keogh JS. 2011a. Palaeoclimate change drove diversification among isolated mountain refugia in the Australian arid zone. *Molecular Ecology* **20**:1529–1545.
- Pepper M, Ho SY, Fujita MK, Scott Keogh J. 2011b. The genetic legacy of aridification: climate cycling fostered lizard diversification in Australian montane refugia and left low-lying deserts genetically depauperate. *Molecular Phylogenetics and Evolution* **61**:750–759.
- Peter BM, Slatkin M. 2013. Detecting range expansions from genetic data. *Evolution* **67**:3274–3289.
- Peter BM, Slatkin M. 2015. The effective founder effect in a spatially expanding population. *Evolution* **69**:721–734.
- Peterson PM, Romaschenko K, Johnson G. 2010. A classification of the Chloridoideae (Poaceae) based on multi-gene phylogenetic trees. *Molecular Phylogenetics and Evolution* **55**:580–598.
- Pisias NG, Moore TC Jr. 1981. The evolution of Pleistocene climate: a time series approach. *Earth and Planetary Science Letters* **52**:450–458.
- Potter S, Bragg JG, Peter BM, Bi K, Moritz C. 2016. Phylogenomics at the tips: inferring lineages and their demographic history in a tropical lizard, *Carlia amax*. *Molecular Ecology* **25**:1367–1380.
- Prasad V, Strömberg CA, Alimohammadian H, Sahni A. 2005. Dinosaur coprolites and the early evolution of grasses and grazers. *Science* **310**:1177–1180.
- Prasad V, Strömberg CA, Leaché AD, Samant B, Patnaik R, Tang L, Mohabey DM, Ge S, Sahni A. 2011. Late cretaceous origin of the rice tribe provides evidence for early diversification in Poaceae. *Nature Communications* **2**:480.
- Python Software Foundation. 2016. *Python language reference, version 2.7*. <https://docs.python.org/2.7/>
- R Development Core Team. 2015. *R: a language and environment for statistical computing*. Vienna, Austria: R Foundation for Statistical Computing.
- Rowe KC, Reno ML, Richmond DM, Adkins RM, Steppan SJ. 2008. Pliocene colonization and adaptive radiations in Australia and New Guinea (Sahul): multilocus systematics of the old endemic rodents (Muroidea: Murinae). *Molecular Phylogenetics and Evolution* **47**:84–101.
- Sakaguchi S, Bowman DMJS, Prior LD, Crisp MD, Linde CC, Tsumura Y, Isagi Y. 2013. Climate, not Aboriginal landscape burning, controlled the historical demography and distribution of fire-sensitive conifer populations across Australia. *Proceedings of the Royal Society B. Biological Sciences* **280**:20132182.
- Shepherd KA, Waycott M, Calladine A. 2004. Radiation of the Australian Salicornioideae (Chenopodiaceae)–based on evidence from nuclear and chloroplast DNA sequences. *American Journal of Botany* **91**:1387–1397.
- Shoo LP, Rose R, Doughty P, Austin JJ, Melville J. 2008. Diversification patterns of pebble-mimic dragons are consistent with historical disruption of important habitat corridors in arid Australia. *Molecular Phylogenetics and Evolution* **48**:528–542.
- Smith MA. 2009. Late Quaternary landscapes in Central Australia: sedimentary history and palaeoecology of Puritjarra rock shelter. *Journal of Quaternary Science* **24**:747–760.
- Soreng RJ, Peterson PM, Romaschenko K, Davidse G, Zuloaga FO, Judziewicz EJ, Filgueiras TS, Davis JI, Morrone O. 2015. A worldwide phylogenetic classification of the Poaceae (Gramineae). *Journal of Systematics and Evolution* **53**:117–137.
- South A. 2011. rworldmap: a new R package for mapping global data. *The R Journal* **3**:35–43.
- Strasburg JL, Kearney M. 2005. Phylogeography of sexual *Heteronotia binoei* (Gekkonidae) in the Australian arid zone: climatic cycling and repetitive hybridization. *Molecular Ecology* **14**:2755–2772.
- Streicher JW, McEntee JP, Drzich LC, Card DC, Schield DR, Smart U, Parkinson CL, Jezkova T, Smith EN, Castoe TA. 2016. Genetic surfing, not allopatric divergence, explains spatial sorting of mitochondrial haplotypes in venomous coralsnakes. *Evolution* **70**:1435–1449.
- Toon A, Crisp MD, Gamage H, Mant J, Morris DC, Schmidt S, Cook LG. 2015. Key innovation or adaptive change? A test of leaf traits using Triodiinae in Australia. *Scientific Reports* **5**:12398.
- Walker JD, Geissman JW, Bowring SA, Babcock LE. 2012. *Geological time scale v. 4.0*. Geological Society of America. doi:10.1130/2012.CTS004R3C
- Watson L, Dallwitz MJ. 1992. *The grass genera of the world: descriptions, illustrations, identification, and information retrieval; including synonyms, morphology, anatomy, physiology, phytochemistry, cytology, classification, pathogens, world and local distribution, and references*. <https://www.delta-intkey.com/grass/index.htm> (28 March 2019).
- Williams MAJ. 1984. Cenozoic evolution of arid Australia. In: Cogger HG, Cameron EE, eds. *Arid Australia: Proceedings of a Symposium on the Origins, Biota and Ecology of Australia's Arid Regions*. Sydney, NSW: Australian Museum, 59–78.

Willing EM, Dreyer C, van Oosterhout C. 2012. Estimates of genetic differentiation measured by  $F_{ST}$  do not necessarily require large sample sizes when using many SNP markers. *PLoS One* 7:e42649.

Zachos J, Pagani M, Sloan L, Thomas E, Billups K. 2001. Trends, rhythms, and aberrations in global climate 65 Ma to present. *Science* 292:686–693.

Zhan S, Zhang W, Niitpõld K, Hsu J, Haeger JF, Zalucki MP, Altizer S, de Roode JC, Reppert SM, Kronforst MR. 2014. The genetics of

monarch butterfly migration and warning colouration. *Nature* **514**:317–321.

Zhang J, Kobert K, Flouri T, Stamatakis A. 2014. PEAR: a fast and accurate illumina paired-end read merger. *Bioinformatics* **30**:614–620.
